# Supplementary material for: Retention Time Extended by Nanoparticles Improves the Eradication of Highly Antibiotic-Resistant Helicobacter pylori
Source: MDPI journal article supplement (doi:10.3390/pharmaceutics14102117), 2022-10-05
Supplement: s1 [file s1]

(a)

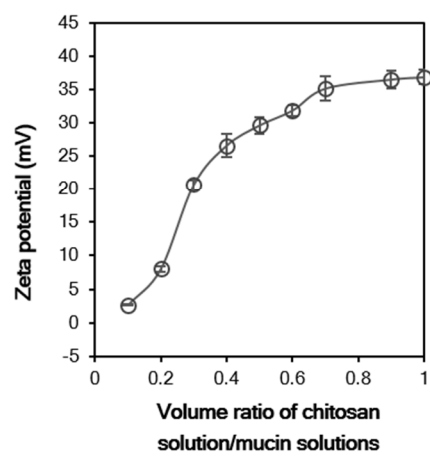

(b)

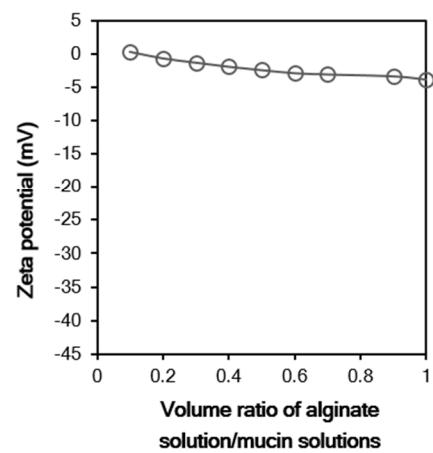

**Figure S1.** Surface charge change of mucin particles in the solutions of (a) chitosan and (b) alginate.
